# Supplementary material for: Tuning catalytic activity with steric and electron-withdrawing effects of a porphyrin substituent
Source: Royal Society of Chemistry journal article supplement (doi:10.1039/d3cy00758h), 2023-01-01
Supplement: d3cy00758h1.pdf [file d3cy00758h1.pdf]

**Supporting Information of**

**Tuning Catalytic Activity with Steric and Electron-Withdrawing Effects of Porphyrin  
Substituent.**

Lulu Jiang, Yosuke Imanaka, and Hiroshi Fujii\*

*Department of Chemistry, Biology, and Environmental Sciences, Graduate School of  
Humanities and Sciences, Nara Women's University, Nara 630-8506, Japan.*

† Nara Women's University

\* To whom correspondence should be addressed. E-mail: [fujii@cc.nara-wu.ac.jp](mailto:fujii@cc.nara-wu.ac.jp)

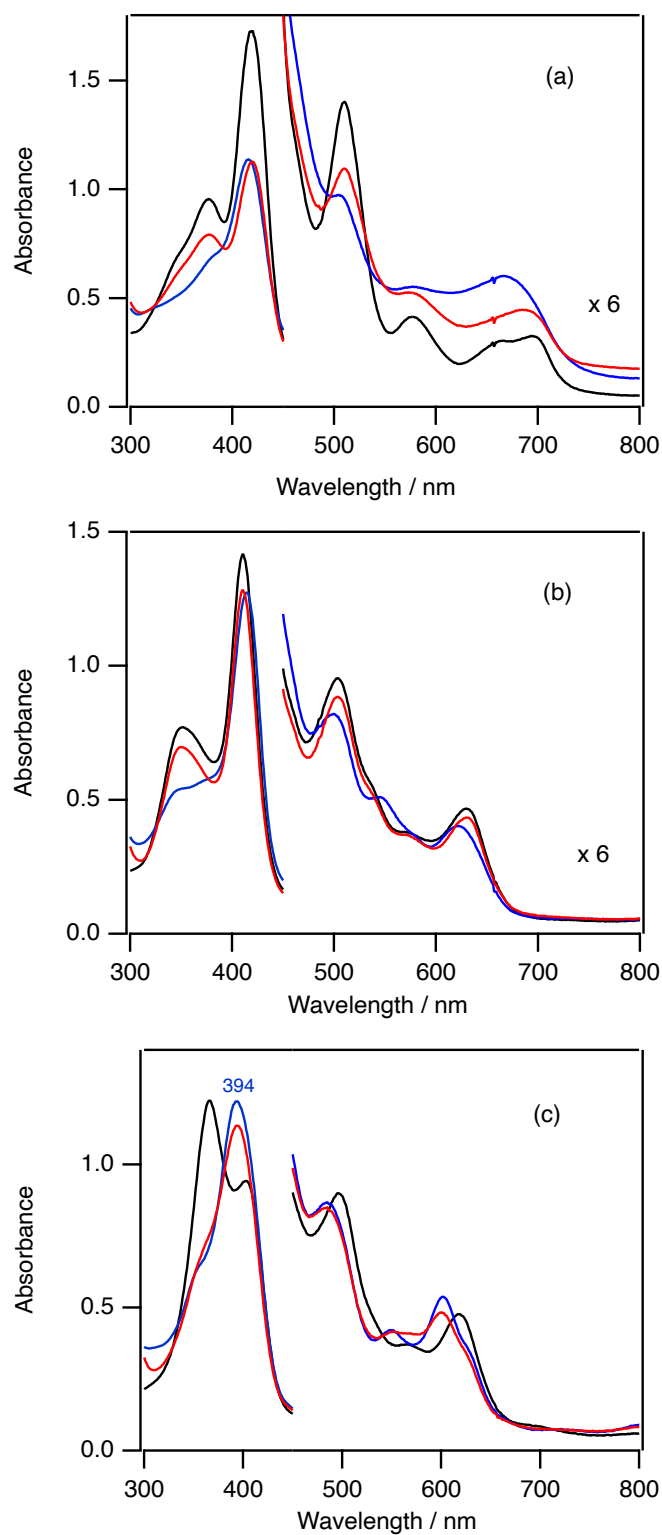

**Figure S1.** Absorption spectral changes in the catalytic cyclohexane oxidation reactions of **2-Cl** (a), **3-Cl** (b), and **5-Cl** (c) with *s*Ph-IO at 20 °C. The concentration of cyclohexane is 0.2 M. Black line: before addition of *s*Ph-IO, blue line: immediate after the addition of *s*Ph-IO, red line: after 300 s.

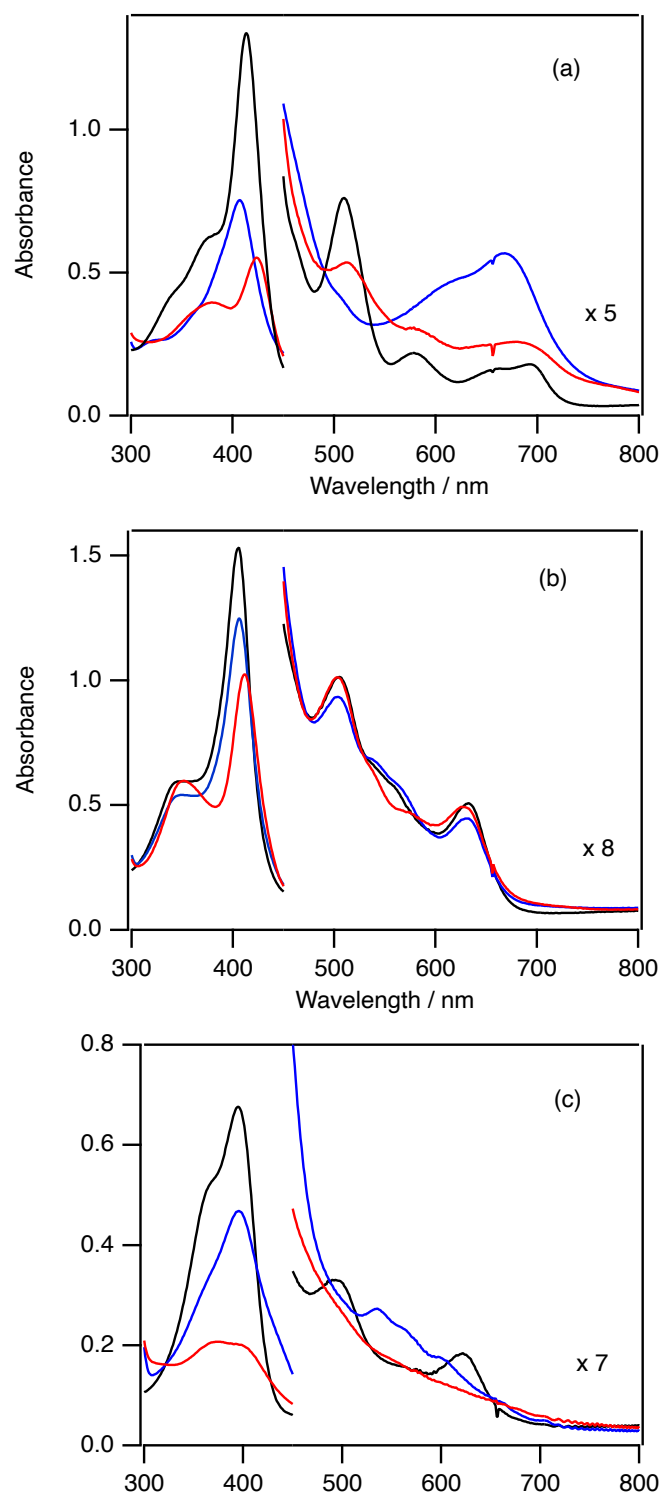

**Figure S2.** Absorption spectral changes in the catalytic cyclohexane oxidation reactions of **2-TFA** (a), **3-TFA** (b), and **5-TFA** (c) with mCPBA at 20 °C. The concentration of cyclohexane is 0.2 M. Black line: before addition of mCPBA, blue line: immediate after the addition of mCPBA, red line: after 300 s.

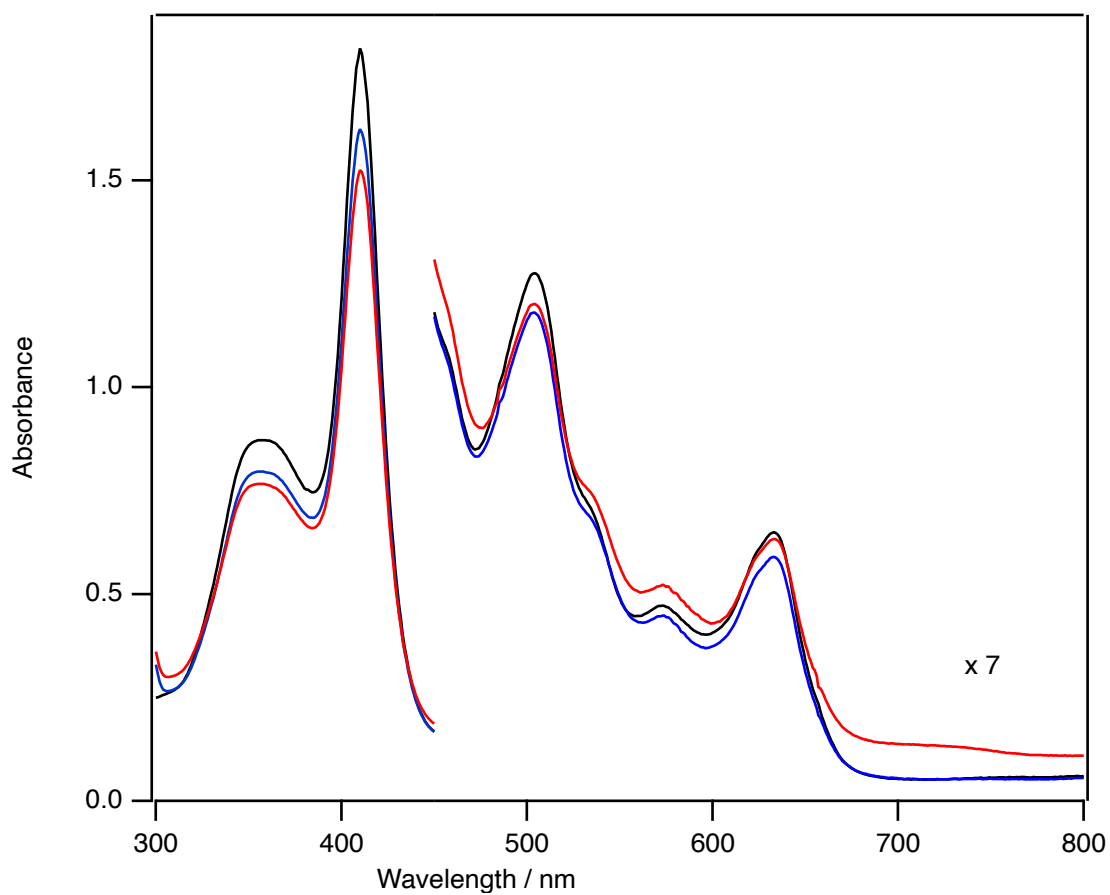

**Figure S3.** Absorption spectral changes in the catalytic reactions of **3-Cl** with cyclohexane (0.2 M) at  $-80\text{ }^{\circ}\text{C}$ . Black line: before the addition of mCPBA (10 equiv), blue line: immediate after the addition of mCPBA, red line: after 300 s.

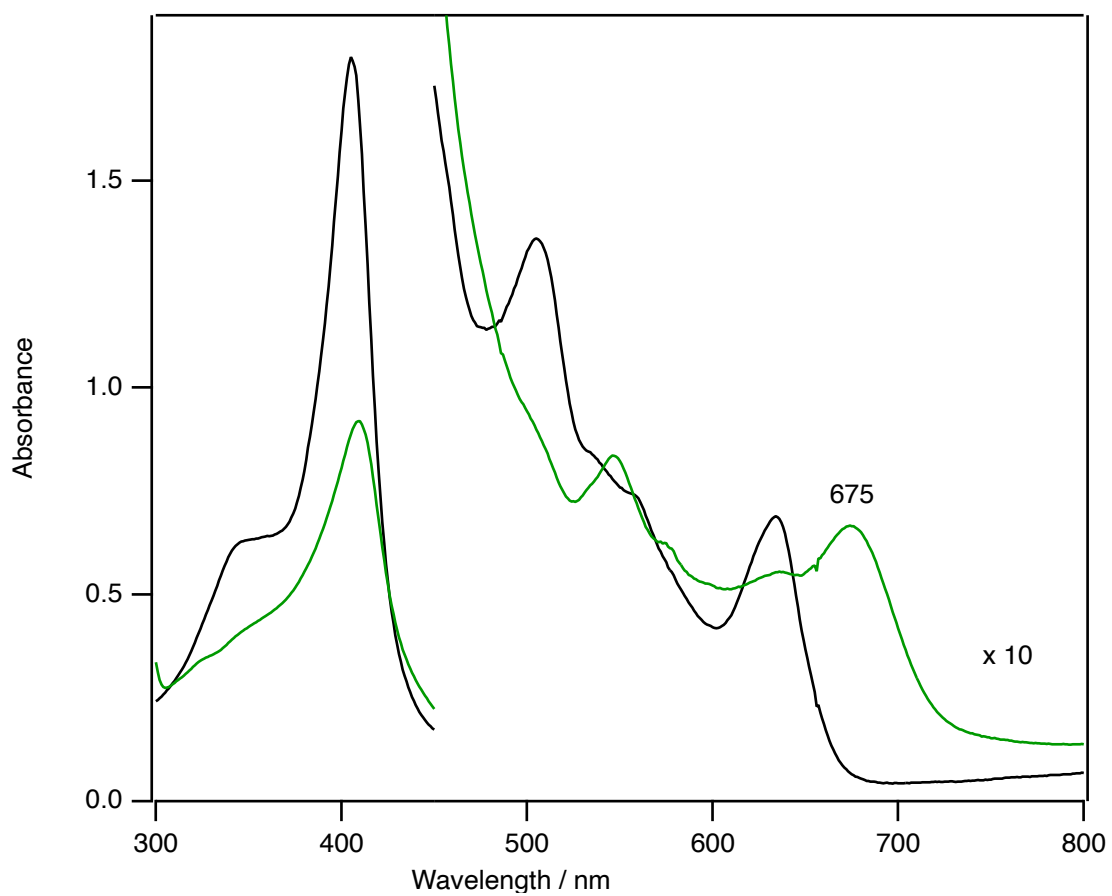

**Figure S4.** Absorption spectral change for the reaction of **3-TFA** with 10 equiv of mCPBA in the absence of cyclohexane at  $-80\text{ }^{\circ}\text{C}$ . Black: 3-TFA, green: 20 s after addition of 10 equiv of mCPBA.

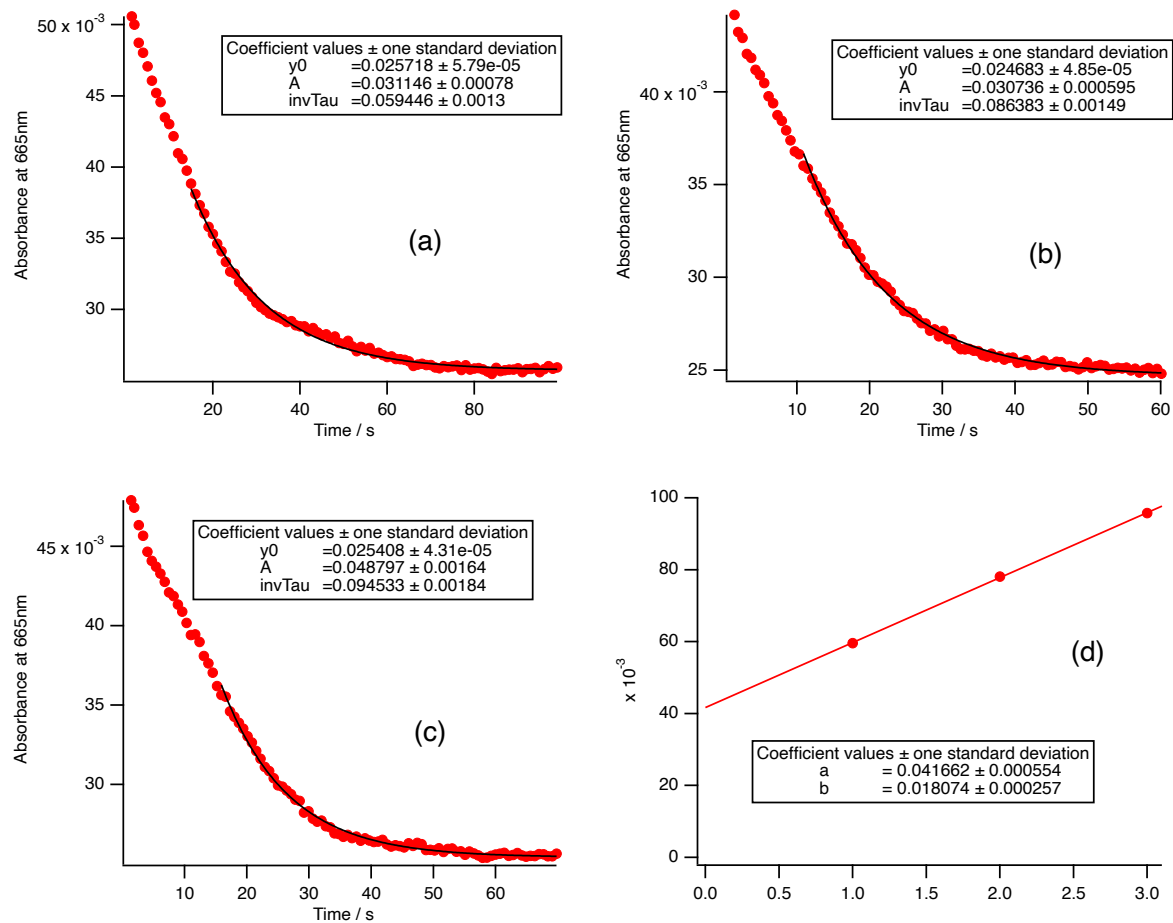

**Figure S5.** (a) ~ (c) Time courses of the absorbance at 665 nm in the reactions of **2-Cpd I** with cyclohexane at 20 °C. Concentration of cyclohexane, (a) 1.0 M, (b) 2.0 M, and (c) 3.0 M. (d) Dependence of the rate constant with the concentration of cyclohexane. The second-order rate constant can be estimated from the gradient of the simulation line,  $1.8 \times 10^{-2} \text{ M}^{-1}\text{s}^{-1}$ .
